# Supplementary material for: A 3D rigid Mn-MOF heterogeneous catalyst for thioether oxidation, cyanosilylation and Knoevenagel condensation
Source: Royal Society of Chemistry journal article supplement (doi:10.1039/d4ce01075b), 2025-01-01
Supplement: d4ce01075b1.pdf [file d4ce01075b1.pdf]

## A 3D rigid Mn-MOF heterogeneous catalyst for thioether oxidation, cyanosilylation and Knoevenagel condensation

Han-Fu Liu,<sup>a,b</sup> Zhi-Rong Hu,<sup>b</sup> Tai-Xue Wu,<sup>b</sup> Hong-Mei Hao,<sup>c</sup> Hai-Ye Li,<sup>\*b</sup> Fu-Ping Huang<sup>\*b</sup>

Table S1 Crystal data and structure refinement for Compound 1

| Identification code                                          | 1                                                                             |
|--------------------------------------------------------------|-------------------------------------------------------------------------------|
| Empirical formula                                            | C <sub>18</sub> H <sub>14</sub> Mn <sub>2</sub> N <sub>8</sub> O <sub>4</sub> |
| Formula weight                                               | 516.25                                                                        |
| Crystal system                                               | trigonal                                                                      |
| Space group                                                  | $R\bar{3}$                                                                    |
| <i>a</i> /Å                                                  | 21.6779(8)                                                                    |
| <i>b</i> /Å                                                  | 21.6779(8)                                                                    |
| <i>c</i> /Å                                                  | 12.6682(5)                                                                    |
| $\alpha$ /°                                                  | 90                                                                            |
| $\beta$ /°                                                   | 90                                                                            |
| $\gamma$ /°                                                  | 120                                                                           |
| Volume/Å <sup>3</sup>                                        | 5155.6(4)                                                                     |
| <i>Z</i>                                                     | 9                                                                             |
| $\rho_{\text{calc}}$ /cm <sup>3</sup>                        | 1.496                                                                         |
| $\mu$ /mm <sup>-1</sup>                                      | 1.142                                                                         |
| <i>F</i> (000)                                               | 2340.0                                                                        |
| Radiation                                                    | MoK $\alpha$ ( $\lambda$ = 0.71073)                                           |
| 2 $\theta$ range for data collection/°                       | 6.51 to 57.518                                                                |
| Index ranges                                                 | -28 ≤ <i>h</i> ≤ 24, -27 ≤ <i>k</i> ≤ 27, -16 ≤ <i>l</i> ≤ 14                 |
| Reflections collected                                        | 8753                                                                          |
| Independent reflections                                      | 2713                                                                          |
| <i>R</i> <sub>int</sub>                                      | 0.0459                                                                        |
| Goodness-of-fit on <i>F</i> <sup>2</sup>                     | 1.064                                                                         |
| Final <i>R</i> indexes [ <i>I</i> ≥ 2 $\sigma$ ( <i>I</i> )] | <i>R</i> <sub>1</sub> = 0.0502, <i>wR</i> <sub>2</sub> = 0.1178               |
| Final <i>R</i> indexes [all data]                            | <i>R</i> <sub>1</sub> = 0.0769, <i>wR</i> <sub>2</sub> = 0.1325               |

a College of Pharmacy, Guilin Medical University, Guilin 541004, P. R. China.

b State Key Laboratory for the Chemistry and Molecular Engineering of Medicinal Resources, School of Chemistry and Pharmaceutical Sciences, Guangxi Normal University, Guilin 541004, P. R. China.

c Department of Chemistry and Pharmacy, Guilin Normal College, Guilin 541004, P. R. China.

Corresponding author: lihaiye2010@163.com (H.-Y. Li); huangfp2010@163.com (F.-P. Huang).

Electronic Supplementary Information (ESI) available: CCDC 2381922. For ESI and crystallographic data in CIF or other electronic format see DOI: 10.1039/x0xx00000x

**Table S2** Selected Bond Lengths (Å) and Angles (°) for Compound 1

| Bond Lengths (Å) |             |            |             |
|------------------|-------------|------------|-------------|
| Mn1—O1A          | 2.112 (3)   | Mn1—N2     | 2.219 (2)   |
| Mn1—O2           | 2.125 (3)   | Mn1—N3B    | 2.293 (2)   |
| Mn1—N1           | 2.355 (3)   | Mn1—N4C    | 2.432 (3)   |
| Bond Angles (°)  |             |            |             |
| O1A—Mn1—O2       | 95.68 (12)  | O2—Mn1—N3B | 95.29 (10)  |
| O1A—Mn1—N1       | 160.60 (11) | O2—Mn1—N4C | 169.41 (10) |
| O1A—Mn1—N2       | 89.14 (11)  | N1—Mn1—N4C | 89.20 (9)   |
| O1A—Mn1—N3B      | 86.88 (11)  | N2—Mn1—N1  | 72.92 (9)   |
| O1A—Mn1—N4C      | 87.56 (10)  | N2—Mn1—N3B | 175.35 (9)  |
| O2—Mn1—N1        | 90.98 (11)  | N2—Mn1—N4C | 102.67 (9)  |
| O2—Mn1—N2        | 87.49 (10)  | N3B—Mn1—N1 | 110.67 (9)  |
| N3B—Mn1—N4C      | 74.77 (9)   |            |             |

Symmetry codes: (A)  $y+1/3, -x+y+2/3, -z+2/3$ ; (B)  $x-y+1/3, x-1/3, -z+2/3$ ; (C)  $-x+y+1/3, -x+2/3, z-1/3$ ; (D)  $-x+1, -y+1, -z+1$ ; (E)  $y+2/3, x-y+1/3, z+1/3$ .

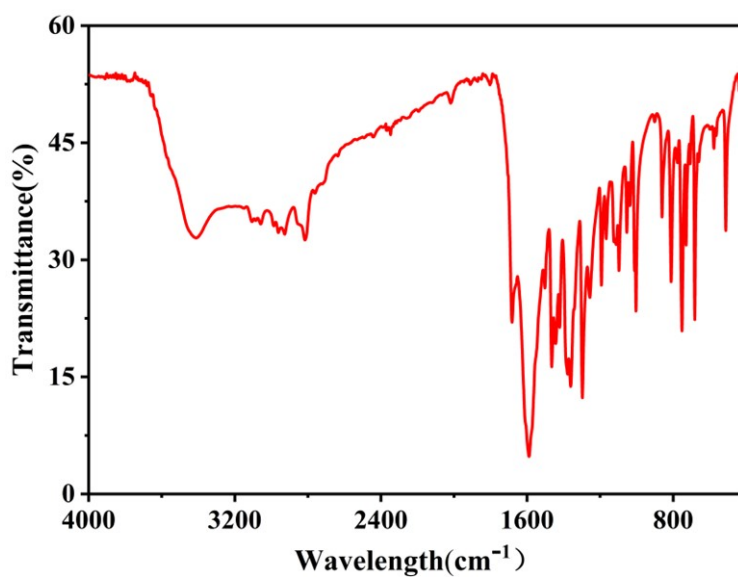**Fig. S1.** IR spectra of Compound 1

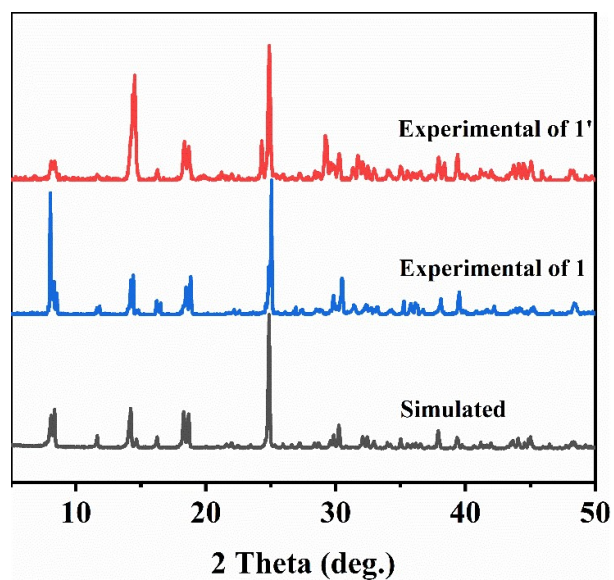

Fig. S2. PXRD patterns of 1 and 1'

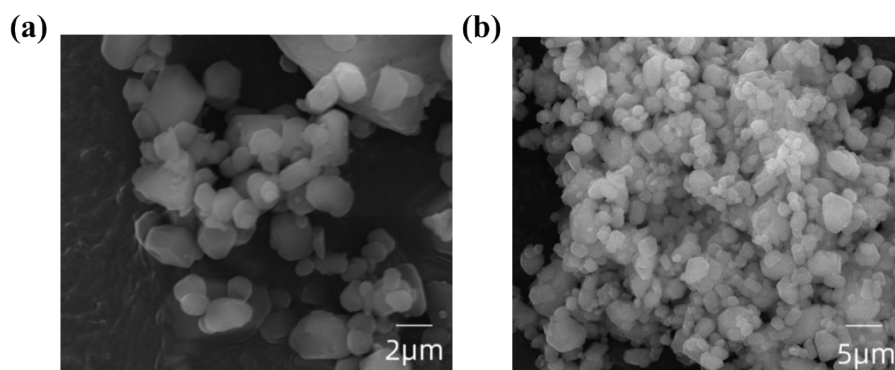

Fig. S3. SEM images of 1'

Table S3 SHAPE analysis of Mn(II) ion in 1.

|                     |                                                                                      |
|---------------------|--------------------------------------------------------------------------------------|
|                     | $\text{MnN}_4\text{O}_2$                                                             |
| Coordination modes  | 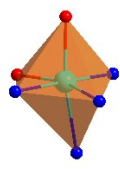 |
| label               | OC-6                                                                                 |
| symmetry            | Oh                                                                                   |
| shape               | Octahedron                                                                           |
| Calculation results | Distortion( $\tau_{\min}$ )<br>Mn1 (2.311)                                           |

**Table S4** Optimizing the reaction condition of thioether oxidation catalyzed by  $[\text{Mn}_2(\text{b-6-mpbt})(\text{HCOO})_2]_n$ .

| Entry | Thioanisole (mmol) | NaClO (mmol) | $[\text{Mn}_2(\text{b-6-mpbt})(\text{HCOO})_2]_n$ (mg) | Time (h) | T (°C) | Solvent          | Conv. <sup>a</sup> (%) |
|-------|--------------------|--------------|--------------------------------------------------------|----------|--------|------------------|------------------------|
| 1     | 4.0                | 8            | 40 <sup>b</sup>                                        | 4        | 60     | DMF              | Trace                  |
| 2     | 4.0                | 8            | 40 <sup>b</sup>                                        | 4        | 60     | H <sub>2</sub> O | 16.53                  |
| 3     | 4.0                | 8            | 40 <sup>b</sup>                                        | 4        | 60     | EtOH             | 80.25                  |
| 4     | 4.0                | 8            | 40 <sup>b</sup>                                        | 4        | 60     | MeOH             | 83.34                  |
| 5     | 4.0                | 8            | None                                                   | 4        | 60     | MeOH             | 9.85                   |
| 6     | 4.0                | 8            | 10                                                     | 4        | 60     | MeOH             | 55.69                  |
| 7     | 4.0                | 8            | 20                                                     | 4        | 60     | MeOH             | 83.25                  |
| 8     | 4.0                | 8            | 30                                                     | 4        | 60     | MeOH             | 92.67                  |
| 9     | 4.0                | 8            | 40                                                     | 4        | 60     | MeOH             | 99.29                  |
| 10    | 4.0                | 8            | 40                                                     | 4        | 50     | MeOH             | 85.54                  |
| 11    | 4.0                | 8            | 40                                                     | 4        | 40     | MeOH             | 62.61                  |
| 12    | 4.0                | 8            | 40                                                     | 4        | 30     | MeOH             | 24.34                  |
| 13    | 4.0                | 8            | 40                                                     | 1        | 60     | MeOH             | 35.83                  |
| 14    | 4.0                | 8            | 40                                                     | 2        | 60     | MeOH             | 62.01                  |
| 15    | 4.0                | 8            | 40                                                     | 3        | 60     | MeOH             | 86.11                  |
| 16    | 4.0                | 4            | 20                                                     | 24       | 60     | MeOH             | 99.32                  |
| 17    | 4.0                | 4            | 10                                                     | 24       | 60     | MeOH             | 93.25                  |
| 18    | 4.0                | 4            | 5                                                      | 24       | 60     | MeOH             | 81.33                  |

<sup>a</sup> GC-MS measurement was used to determine the conversion rate

<sup>b</sup> **1** was used as the catalyst.

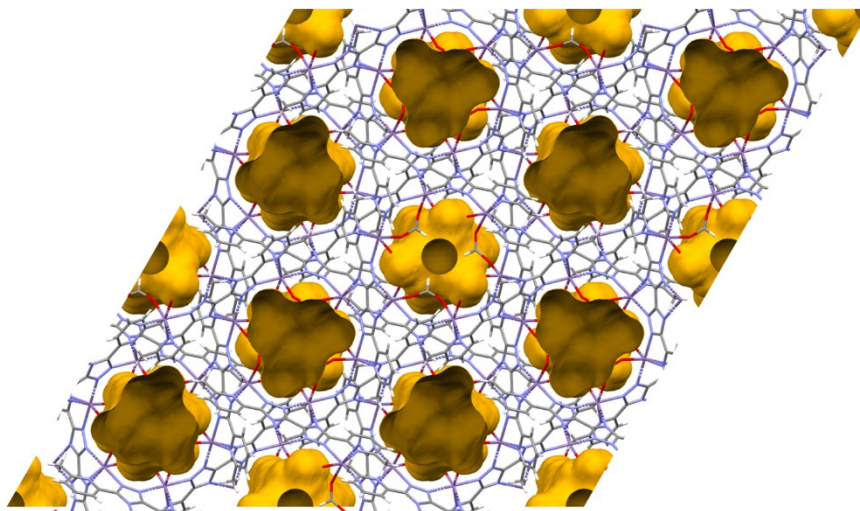**Fig. S4.** 3D porous framework of **1****Table. S5** The catalytic efficiency of different MOFs for thioether oxidation, cyanosilylation and Knoevenagel condensation.

| Catalyst                                                                            | catalytic reaction types | Yield (%) | Ref.      |
|-------------------------------------------------------------------------------------|--------------------------|-----------|-----------|
| $\{[\text{Mn}_2(\text{b-6-mpbt})(\text{HCOO})_2] \cdot 1.5\text{CH}_3\text{OH}\}_n$ |                          | 99.29%    | This work |

|                                                                                                                                                                                                                                                                  |                                                                                      |        |           |
|------------------------------------------------------------------------------------------------------------------------------------------------------------------------------------------------------------------------------------------------------------------|--------------------------------------------------------------------------------------|--------|-----------|
| UiO-66                                                                                                                                                                                                                                                           | 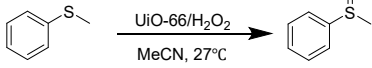   | 59%    | 1         |
| UiO-67                                                                                                                                                                                                                                                           |    | 51%    | 1         |
| PPh <sub>4</sub> [ <sup>SO</sup> <sub>2</sub> LVO <sub>2</sub> ]                                                                                                                                                                                                 |    | 95%    | 2         |
| [(TPY-Br)CuCl(DMSO)(H <sub>2</sub> O)] <sub>2</sub><br>[(TPY-Br)CuCl] <sub>2</sub><br>[W <sub>10</sub> O <sub>32</sub> ] • 2DMSO • 4H <sub>2</sub> O                                                                                                             |    | 99.9%  | 3         |
| (Hbiz) <sub>12</sub> [(P <sub>2</sub> Co <sub>2</sub> Mo <sup>V</sup> <sub>4</sub> O <sub>8</sub> ) <sub>2</sub> (P <sub>2</sub> Mo <sup>V</sup> <sub>2</sub> O <sub>8</sub> ) <sub>4</sub> ]                                                                    |    | >99%   | 4         |
| (Bu <sub>4</sub> N) <sub>4</sub> [PW <sub>11</sub> Nb(O <sub>2</sub> )O <sub>39</sub> ]                                                                                                                                                                          |    | 91%    | 5         |
| {[Mn <sub>2</sub> (b-6-mpbt)(HCOO) <sub>2</sub> ]•1.5CH <sub>3</sub> OH} <sub>n</sub>                                                                                                                                                                            |   | 99.16% | This work |
| Complex 2a                                                                                                                                                                                                                                                       |  | 99%    | 6         |
| Ce-4L                                                                                                                                                                                                                                                            |  | 68%    | 7         |
| {(dpdo)[Pr <sub>2</sub> (H <sub>2</sub> O) <sub>9</sub> (dpdo)][Pr(H <sub>2</sub> O) <sub>5</sub> ] <sub>2</sub> [Pr(H <sub>2</sub> O) <sub>4</sub> ] <sub>2</sub> [V <sub>10</sub> O <sub>28</sub> ][NiV <sub>12</sub> O <sub>38</sub> ]} • 27H <sub>2</sub> O} |  | 99.6%  | 8         |
| Y/Eu-MOF                                                                                                                                                                                                                                                         |  | >99%   | 9         |
| {[Zn <sub>2</sub> (4-tpom) <sub>2</sub> (oxdz) <sub>2</sub> ] • 4H <sub>2</sub> O} <sub>n</sub>                                                                                                                                                                  |  | 96%    | 10        |
| Cu(D-Valmet) • xH <sub>2</sub> O; x<1                                                                                                                                                                                                                            |  | 97.3%  | 11        |
| {[Mn <sub>2</sub> (b-6-mpbt)(HCOO) <sub>2</sub> ]•1.5CH <sub>3</sub> OH} <sub>n</sub>                                                                                                                                                                            |  | 97.37% | This work |
| Fe <sub>3</sub> O <sub>4</sub> /cellulose/Co-MOF                                                                                                                                                                                                                 |  | 94%    | 12        |

|                                                                                               |                                                                                    |      |    |
|-----------------------------------------------------------------------------------------------|------------------------------------------------------------------------------------|------|----|
| MOF-5                                                                                         | 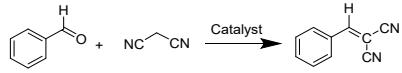 | 99%  | 13 |
| Tb-DCBA                                                                                       |  | >99% | 14 |
| JLU-MOF116                                                                                    |  | 95%  | 15 |
| JLU-MOF117                                                                                    |  | 99%  | 15 |
| Ce-4L                                                                                         |  | 77%  | 7  |
| $\{[\text{Co}_3(\text{TNBTB})_2(\text{PTP})] \cdot 7\text{DMF} \cdot 6\text{H}_2\text{O}\}_n$ |  | 99%  | 16 |

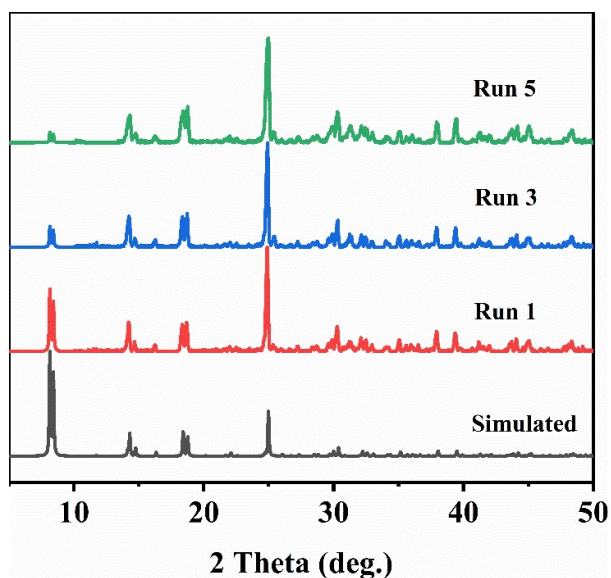

Fig. S5. PXRD spectra of 1' after 5 runs of thioether oxidation.

Table S6 Control and condition optimization experiments of benzaldehyde silanization reaction catalyzed by 1'

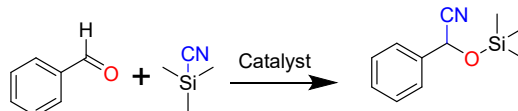

| Entry | Catalyst (mg) | Time (h) | Temperature (°C) | Conv. (%) |
|-------|---------------|----------|------------------|-----------|
| 1     | 0             | 3        | 30               | 11.21     |
| 2     | 10            | 3        | 30               | 36.32     |
| 3     | 20            | 3        | 30               | 58.71     |
| 4     | 30            | 3        | 30               | 92.67     |
| 5     | 40            | 3        | 30               | 99.16     |
| 6     | 50            | 3        | 30               | 98.21     |
| 7     | 40            | 3        | 20               | 69.34     |
| 8     | 40            | 3        | 10               | 45.11     |

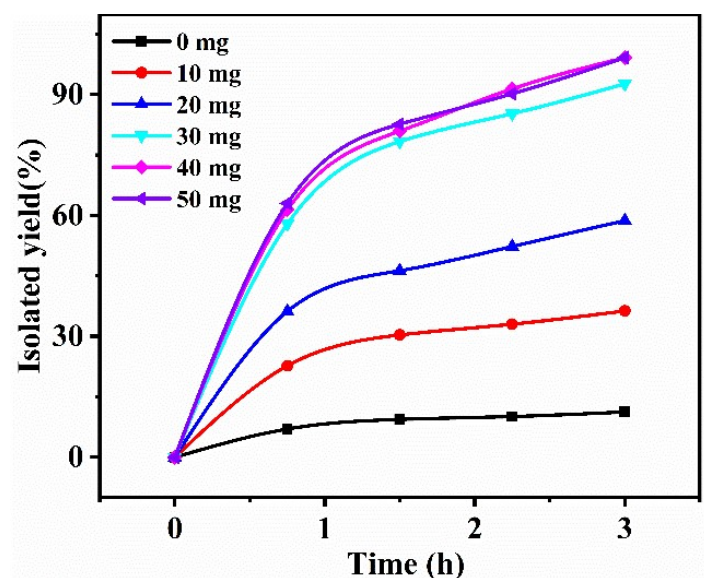

Fig. S6. Optimization of catalyst dosage for benzaldehyde silanization reaction

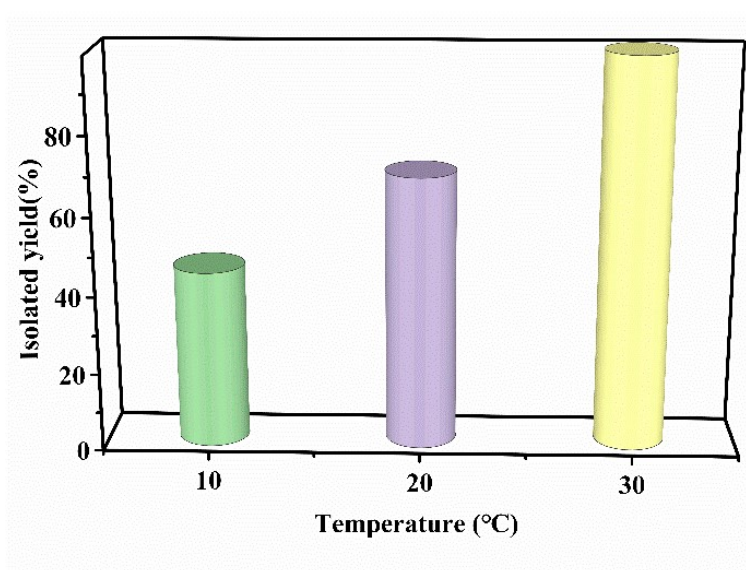

Fig. S7. The conversion of benzaldehyde silanization catalyzed by 1' at different temperatures

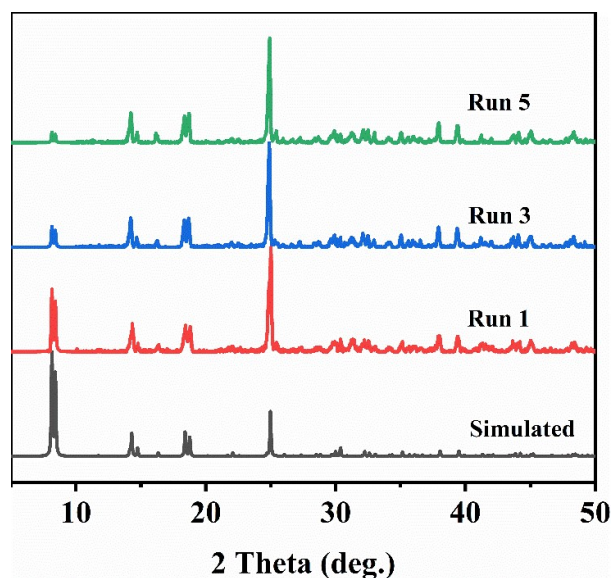

Fig. S8. PXRD spectrum of 1' after 5 runs of catalytic silanization reaction.

Table S7 Control and condition optimization experiments of benzaldehyde Knoevenagel condensation reaction catalyzed by 1'

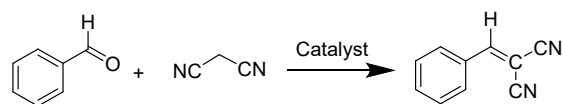

| Entry | Catalyst (mg) | Time (h) | T (°C) | Conv. (%) |
|-------|---------------|----------|--------|-----------|
| 1     | 0             | 2        | 30     | 21.13     |
| 2     | 10            | 2        | 30     | 70.66     |
| 3     | 20            | 2        | 30     | 92.31     |
| 4     | 30            | 2        | 30     | 97.37     |
| 5     | 40            | 2        | 30     | 97.52     |
| 6     | 30            | 2        | 10     | 36.21     |
| 7     | 30            | 2        | 20     | 65.29     |
| 8     | 30            | 0.5      | 30     | 42.35     |
| 9     | 30            | 1        | 30     | 68.44     |
| 10    | 30            | 1.5      | 30     | 86.73     |
| 11    | 30            | 3        | 30     | 97.61     |
| 12    | 30            | 4        | 30     | 97.65     |

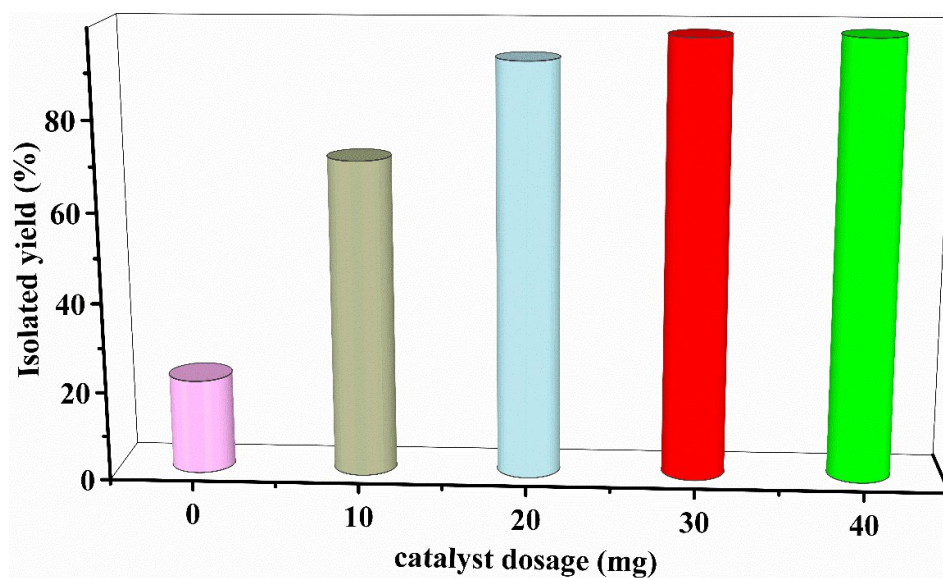

Fig. S9. The relationship between the amount of catalyst and the yield of catalytic conversion in benzaldehyde Knoevenagel condensation reaction.



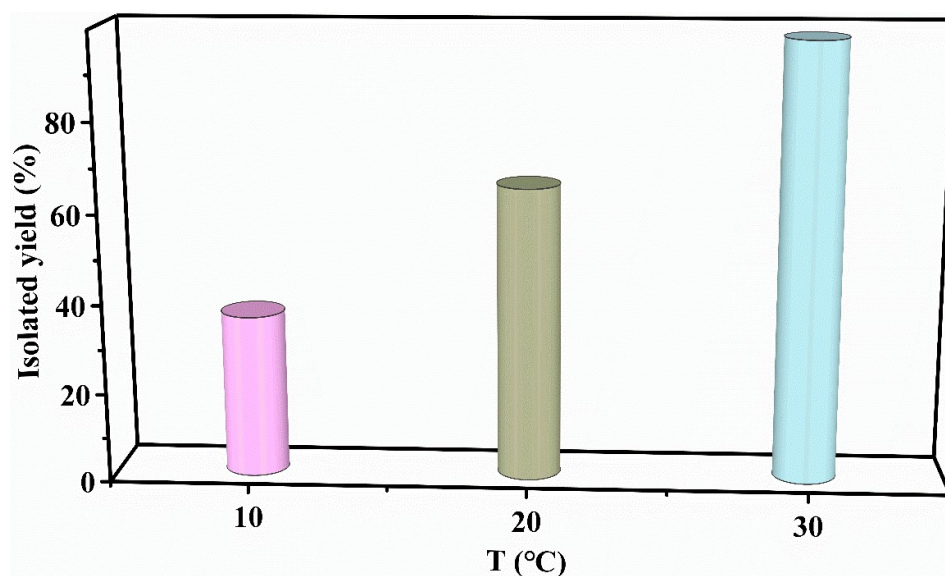

Fig. S10. The conversion of benzaldehyde Knoevenagel condensation reaction catalyzed by 1' at different temperatures

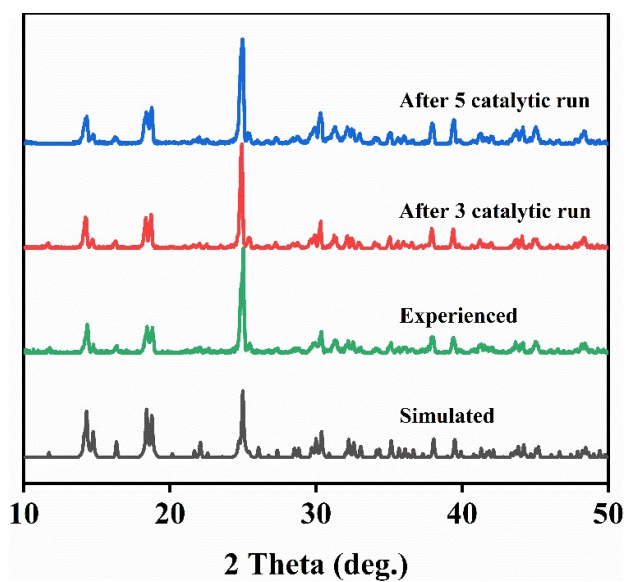

Fig. S11. PXRD spectrum of 1' after 5 runs of catalytic Knoevenagel condensation reaction.

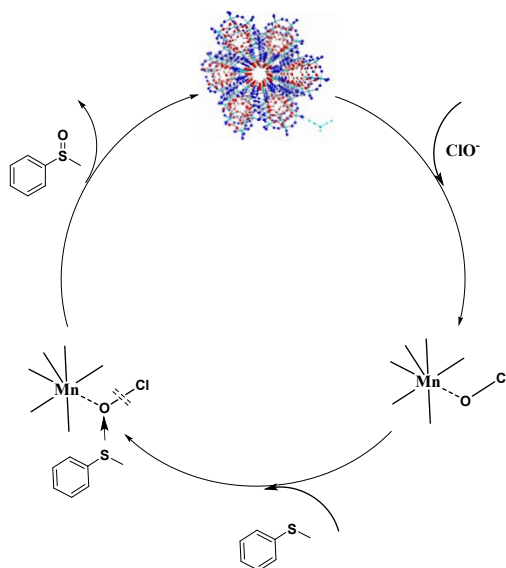

Fig. S12. Probable mechanism of the thioether oxidation reaction catalyzed by 1'.

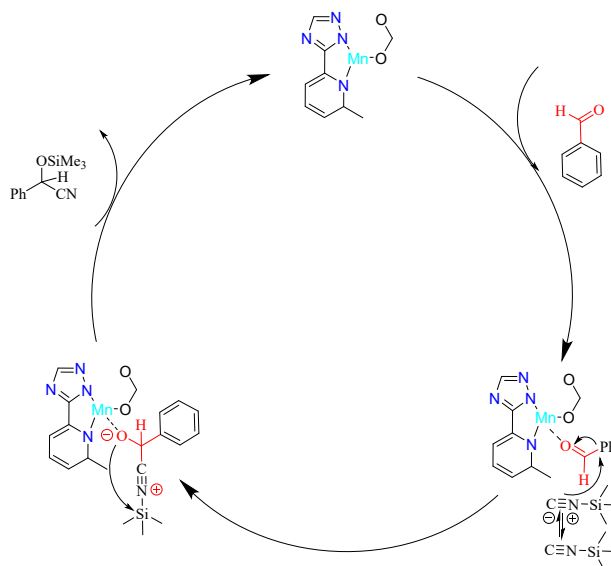

Fig. S13. Probable mechanism of the cyanosilylation reaction catalyzed by 1'.

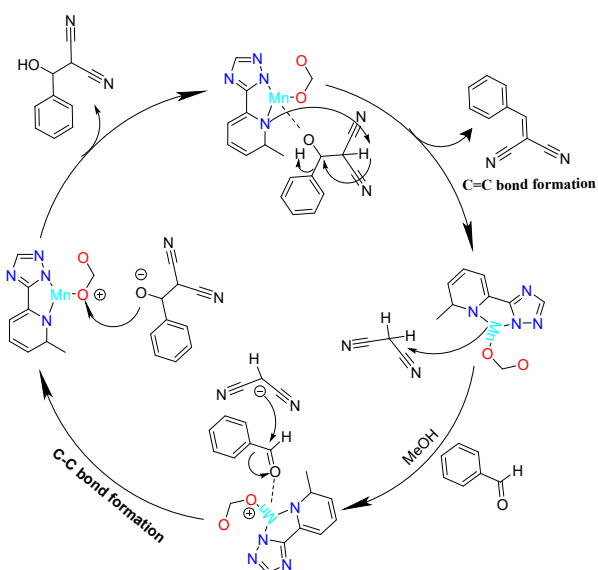

Fig. S14. Probable mechanism of the Knoevenagel condensation reaction catalyzed by 1'.

Squeeze results for **1** is as follows:

loop\_

\_platon\_squeeze\_void\_nr

\_platon\_squeeze\_void\_average\_x

\_platon\_squeeze\_void\_average\_y

\_platon\_squeeze\_void\_average\_z

\_platon\_squeeze\_void\_volume

\_platon\_squeeze\_void\_count\_electrons

\_platon\_squeeze\_void\_content

1 0.000 0.000 0.000 9 0''

|   |       |       |        |     |       |
|---|-------|-------|--------|-----|-------|
| 2 | 0.333 | 0.667 | 0.167  | 323 | 71 '' |
| 3 | 0.667 | 0.333 | -0.167 | 322 | 70 '' |
| 4 | 0.000 | 0.000 | 0.500  | 320 | 70 '' |
| 5 | 0.667 | 0.333 | 0.333  | 11  | 0 ''  |
| 6 | 0.333 | 0.667 | 0.667  | 11  | 0 ''  |

That is, SQUEEZE gives 211 electrons/unit cell for the voids. If these electrons are all from CH<sub>3</sub>OH (16e<sup>-</sup>), each unit cell has  $211/16 \approx 13$  CH<sub>3</sub>OH molecules, and each formula unit has 1.5 CH<sub>3</sub>OH molecules (since Z = 9). So the suitable formula for this compound should be  $\{[\text{Mn}_2(\text{L})(\text{HCOO})_2] \cdot 1.5\text{CH}_3\text{OH}\}_n$

## references

1. O. V. Zalomaeva, V. Y. Evtushok, I. D. Ivanchikova, T. S. Glazneva, Y. A. Chesalov, K. P. Larionov, I. Y. Skobelev and O. A. Kholdeeva, *Inorg. Chem.*, 2020, **59**, 10634-10649.
2. C. G. Werncke, C. Limberg, C. Knispel, R. Metzinger and B. Braun, *Chemistry – A European Journal*, 2011, **17**, 2931-2938.
3. Y. Zhang, W. D. Yu, F. Q. Wang, X. Wang, J. Zhou, C. Liu and J. Yan, *Chin. J. Chem.* 2024, **42**, 592-598.
4. X. Liu, N. Xu, X. Liu, Y. Guo and X. Wang, *Chem. Commun.*, 2022, **58**, 12236-12239.
5. O. V. Zalomaeva, N. V. Maksimchuk, G. M. Maksimov and O. A. Kholdeeva, *Eur. J. Inorg. Chem.*, 2018, **2019**, 410-416.
6. K. Lu, H. Qiu, X. Chen, T. Yuan, F. Xue and M. Ma, *J. Mol. Struct.*, 2024, **1295**, 136796.
7. P. Zhao, Y. Liu, C. He and C. Duan, *New J. Chem.*, 2023, **47**, 19114-19121
8. H. An, J. Zhang, S. Chang, Y. Hou and Q. Zhu, *Inorg. Chem.*, 2020, **59**, 10578-10590.
9. E. Echenique-Errandonea, M. E. López-Vargas, J. M. Pérez, S. Rojas, D. Choquesillo-Lazarte, J. M. Seco, I. Fernández and A. Rodríguez-Diéguez, *Catalysts*, 2022, **12**, 299.
10. A. Chanda and S. K. Mandal, *Inorg. Chem.*, 2024, **63**, 5598-5610.
11. Z. Arora, D. I. Eftemie, A. Spinciu, C. Maxim, A. M. Hanganu, M. Tudorache, B. Cojocar, O. D. Pavel, P. Granger, M. Andruh and V. I. Pârvulescu, *ChemCatChem*, 2021, **13**, 4634-4644.
12. E. Zare and Z. Rafiee, *Appl. Organomet. Chem.*, 2020, **34**: e5516.
13. C. Guo, Y. Zhang, L. Zhang, Y. Zhang and J. Wang, *CrystEngComm*, 2018, **20**, 5327-5331.
14. K. Cai, W. Tan, N. Zhao and H. He, *Cryst Growth Des.*, 2020, **20**, 4845-4851.
15. J. Qiao, B. Zhang, L. Zhang and Y. Liu, *J. Mater. Chem. A*, 2022, **10**, 17773-17781.
16. X. Zhang, X. Wang, C. Li, T. Hu and L. Fan, *J. Colloid Interface Sci.*, 2024, **656**, 127-136.
